# Supplementary material for: Combining different proteomic approaches to resolve complexity of the milk protein fraction of dromedary, Bactrian camels and hybrids, from different regions of Kazakhstan
Source: PLOS journal article supplement (doi:10.1371/journal.pone.0197026), 2018-05-10
Supplement: S2 (10.1371/journal.pone.0197026.s002) [file journal.pone.0197026.s002]

## Request for Permission to Publish Content under CC-BY License

Dear Rights Holder or Representative,

I have submitted a paper for publication in a PLOS journal, and wish to include the content listed below in the paper. I'm hereby requesting your (or your company's or institution's) permission to include the content in my paper. Please note that all PLOS journals are published under a Creative Commons Attribution License (CC BY), which allows for unrestricted use and distribution, even commercial, as long as attribution is given to the creator or rights holder of the content. See <https://creativecommons.org/licenses/by/4.0/>.

To grant me permission to use the content in my PLOS paper, please fill in the information below and then scan the completed form and send it to me at my email address.

Thank you.

My name:

My email address:

Description of the content which I'm seeking permission to use (citation and/or title, and pasted screen shot, if applicable):

Link to the Content:

\* \* \*

On behalf of myself or the rights holder, I hereby grant the permission sought herein.

Signature of Party Granting Permission:

A handwritten signature in black ink, appearing to be 'M. B. B.', is written over the signature line.

Date:

Printed Name and Title:
